# Supplementary material
Source: PubMed Central journal article supplement (PMC8637394)
Supplement: jamadermatol-e214805-s001.pdf [file jamadermatol-e214805-s001.pdf]

## Supplemental Online Content

Ring HC, Maul J-T, Yao Y, et al. Drug survival of biologics in patients with hidradenitis suppurativa. *JAMA Dermatol*. Published online December 1, 2021.  
doi:10.1001/jamadermatol.2021.4805

### **eMethods.**

**eTable 1.** Characteristics of HS patients, prescribing hospitals and treatment series

**eTable 2.** Follow-up time, failure rates and median time to discontinuation in HS patients treated with biologics

**eTable 3.** Univariate Cox regression analysis for adalimumab and infliximab

**eFigure.** Drug-specific persistence in bio-naïve and non-naïve patient

### **eReferences**

This supplemental material has been provided by the authors to give readers additional information about their work.

## **eMethods**

### **Data sources**

In Denmark, all residents are assigned a unique personal identification number at birth or migration through the Danish Civil Registration System <sup>1</sup>, that enables cross-linkage of data from nationwide registries on individual-level. Tax-supported healthcare ensures that all residents have equal and unfettered access to general practitioners and specialists (including dermatologists) without charge, and the Danish National Patient Registry <sup>2</sup> contains prospectively collected data from all inpatient and outpatient contacts at all Danish hospitals, as well as from a number of private clinics. Data includes not only diagnosis, but also information about smoking, treatment procedures and surgeries (including HS-related surgical procedures). The registry contains data on biologic therapies prescribed for HS, which is solely prescribed from academic hospital centers in Denmark. Medication is given free of charge to patients directly from five academic hospital outpatient dermatology clinics (Bispebjerg University Hospital, Herlev-Gentofte University Hospital, and Aarhus University Hospital, respectively). Data on all pharmacy-dispensed medications are recorded in the Danish National Prescription Registry <sup>3</sup>. All laboratory measurements (e.g. C-reactive protein [CRP]) are recorded in the Register of Laboratory Results for Research.

### **Study design**

We all identified biologic treatment series with adalimumab, anakinra, certolizumab pegol, etanercept, golimumab, infliximab, secukinumab, and ustekinumab prescribed specifically for HS during the study period. Treatment series were discontinued at the end of drug supply of the last prescription in the treatment series, or when a new biologic therapy was initiated, whichever

came first. Treatment sequences were merged if the same drug was used in two consecutive series and the discontinuation was less than 90 days.

### **Statistical analysis**

Patient characteristics were presented as frequencies with percentages for categorical variables and continuous variables were presented as means with standard deviations (SDs) or medians with interquartile ranges (IQRs) depending on their distributions. Survival analyses were performed using Cox regression to create adjusted hazard ratios (aHRs) in which age, sex, and number of previous therapies were chosen a priori and included as covariates in the adjusted models. We furthermore explored predictors for drug survival of adalimumab and infliximab (i.e., the two most frequently used biologics for HS) using univariate Cox regression analysis. We generated descriptive (unadjusted) survival curves using Kaplan-Meier plots, and visualized switching patterns using Sankey diagrams. Kaplan-Meier plots were presented as overall, as well as stratified into bio-naïve and non-naïve treatment series. Due to data security requirements, groups containing data on only one or two patients are presented as “less than 3”. All analyses were performed using SAS version 9.4 (SAS Institute Inc. Cary, NC, USA) and STATA version 15.0 (StataCorp, College Station, TX, USA). The Strengthening the Reporting of Observational Studies in Epidemiology (STROBE)<sup>4</sup> recommendations were used for conduct and reporting of this study.

**eTable 1: Characteristics of HS patients, prescribing hospitals and treatment series**

|                                                 | <b>All patients<br/>(n=241)</b> |
|-------------------------------------------------|---------------------------------|
| Age at first biologic, mean (SD)                | 41.8 (12.6)                     |
| Sex, n (%)                                      |                                 |
| Women                                           | 149 (61.8)                      |
| Men                                             | 92 (38.2)                       |
| Body mass index (kg/m <sup>2</sup> ), mean (SD) | 31.9 (8.0)                      |
| Body weight in kg, mean (SD)                    | 101.5 (27.1)                    |
| Smoking, n [%] (%)*                             |                                 |
| Current                                         | 29 [42.7] (12.0)                |
| Former                                          | 27 [39.7] (11.2)                |
| Never                                           | 12 [17.7] (5.0)                 |
| Unknown/missing                                 | 173 (71.8)                      |
| Year of first biologic, n (%)                   |                                 |
| Pre-2010                                        | 42 (17.4)                       |
| 2010-2014                                       | 78 (32.4)                       |
| 2015-2018                                       | 121 (50.2)                      |
| Prescribing hospital, n (%)                     |                                 |
| Bispebjerg                                      | 66 (27.4)                       |
| Gentofte                                        | 10 (4.2)                        |
| Roskilde                                        | 97 (40.2)                       |
| Odense                                          | 21 (8.7)                        |
| Aarhus                                          | 47 (19.5)                       |
| Number of treatment series, n (%)               | 386 (100.0)                     |
| Adalimumab                                      | 256 (66.3)                      |
| Anakinra                                        | 7 (1.8)                         |
| Certolizumab pegol                              | 3 (0.8)                         |
| Etanercept                                      | 23 (6.0)                        |
| Golimumab                                       | 3 (0.8)                         |
| Infliximab                                      | 66 (17.1)                       |
| Secukinumab                                     | 6 (1.6)                         |
| Ustekinumab                                     | 22 (5.7)                        |

\* [%] are percentages among patients with available data, whereas (%) are among the entire cohort SD, Standard deviation

**eTable 2 - Follow-up time, failure rates and median time to discontinuation in HS patients treated with biologics**

|                  | Follow-up time<br>(years) | Failures | Failure rate per 100<br>person-years | 95% CI      | Survival time<br>(weeks), Median<br>(IQR) |
|------------------|---------------------------|----------|--------------------------------------|-------------|-------------------------------------------|
| <b>All</b>       |                           |          |                                      |             |                                           |
| Adalimumab       | 229.3                     | 200      | 87.2                                 | 75.9-100.2  | 36.0 (21.9-63.0)                          |
| Infliximab       | 79.3                      | 58       | 73.1                                 | 56.5-94.6   | 28.7 (15.1-62.9)                          |
| Etanercept       | 13.6                      | 22       | 161.5                                | 106.4-245.3 | 17.9 (12.9-41.0)                          |
| Ustekinumab      | 22.2                      | 12       | 54.0                                 | 30.6-95.0   | 26 (16.9-155.9)                           |
| <b>Bio-naïve</b> |                           |          |                                      |             |                                           |
| Adalimumab       | 170.9                     | 146      | 85.4                                 | 72.6-100.5  | 39.6 (22.9-63.4)                          |
| Infliximab       | 44.6                      | 28       | 62.7                                 | 43.3-90.9   | 33.7 (12.9-65.3)                          |
| Etanercept       | 4.7                       | 9        | 192.0                                | 99.9-369.0  | 17.9 (12.9-23.0)                          |
| Ustekinumab      | 12.8                      | 6        | 47.0                                 | 21.1-104.7  | 40.6 (NA)                                 |
| <b>Non-naïve</b> |                           |          |                                      |             |                                           |
| Adalimumab       | 58.4                      | 54       | 92.5                                 | 70.9-120.8  | 28.9 (13.3-60.1)                          |
| Infliximab       | 34.7                      | 30       | 86.5                                 | 60.5-123.7  | 27.1 (18.6-56.9)                          |
| Etanercept       | 8.9                       | 13       | 145.5                                | 84.5-250.6  | 17.9 (12.9-41.0)                          |
| Ustekinumab      | 9.5                       | 6        | 63.3                                 | 28.4-140.9  | 26.0 (20.3-155.9)                         |

CI, confidence interval; NA, not applicable

**eTable 3 – Univariate Cox regression analysis for adalimumab and infliximab**

|                                    | Adalimumab |                         |               | Infliximab |                         |               |
|------------------------------------|------------|-------------------------|---------------|------------|-------------------------|---------------|
|                                    | n          | HR (95% CI)             | p-value       | n          | HR (95% CI)             | p-value       |
| Age                                | 256        | 1.01 (0.99-1.01)        | 0.7310        | 66         | 0.99 (0.97-1.00)        | 0.1329        |
| Sex                                | 256        | <b>0.69 (0.51-0.91)</b> | <b>0.0101</b> | 66         | 0.94 (0.56-1.58)        | 0.8165        |
| BMI                                | 140        | 0.99 (0.97-1.01)        | 0.3708        | 49         | 1.00 (0.96-1.03)        | 0.7905        |
| CRP                                | 141        | 1.00 (0.99-1.01)        | 0.5995        | 35         | <b>1.01 (1.00-1.03)</b> | <b>0.0319</b> |
| Smoking                            | 82         |                         |               | 35         |                         |               |
| Never                              |            | (reference)             |               |            | (reference)             |               |
| Former                             |            | 1.68 (0.76-3.72)        | 0.2020        |            | 1.31 (0.36-4.77)        | 0.6799        |
| Current                            |            | 2.05 (0.94-4.48)        | 0.0721        |            | 1.39 (0.37-5.16)        | 0.6220        |
| Disease duration                   | 256        | 1.00 (0.97-1.02)        | 0.7138        | 66         | 0.99 (0.95-1.04)        | 0.7365        |
| Previous biologic treatment        | 256        | 1.09 (0.80-1.49)        | 0.5832        | 66         | 1.07 (0.64-1.80)        | 0.7855        |
| Concomitant antibiotic treatment   | 256        | 1.15 (0.77-1.72)        | 0.4982        | 66         | <b>2.82 (1.36-5.86)</b> | <b>0.0055</b> |
| HS surgery during treatment series | 256        | 0.59 (0.29-1.21)        | 0.1516        | 66         | 0.62 (0.26-1.46)        | 0.2773        |

BMI, body-mass index; CI, confidence interval; CRP, C-reactive protein; HR, hazard ratio; HS, hidradenitis suppurativa

**eFigure. Drug-specific persistence in bio-naïve and non-naïve patients**

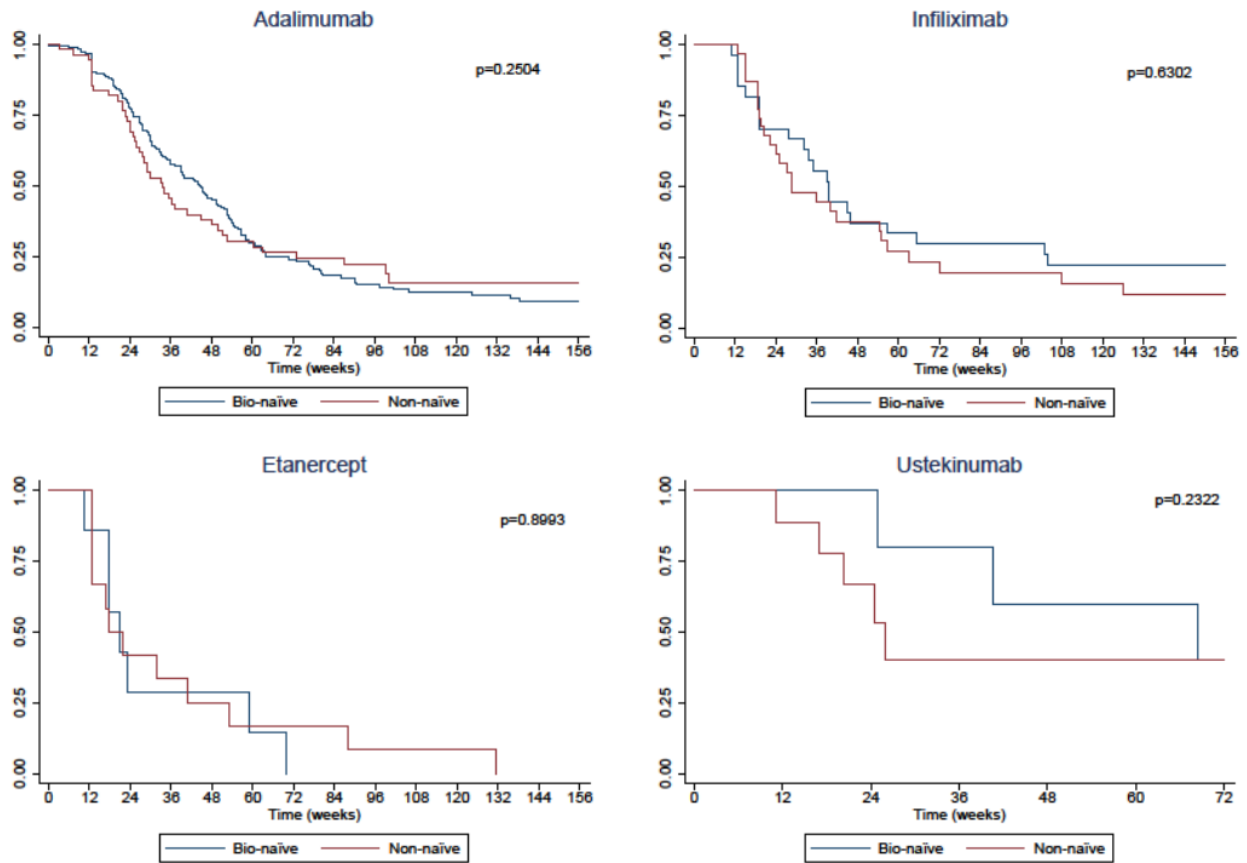

eFigure illustrates the drug-specific persistence of each biologics (Adalimumab, Infliximab, Etanercept and Ustekinumab, respectively) in bio-naïve and non-naïve HS patients

## eReferences

1. Schmidt, M., Pedersen, L. & Sørensen, H. T. The Danish Civil Registration System as a tool in epidemiology. *European Journal of Epidemiology* vol. 29 541–549 (2014).
2. Schmidt, M. *et al.* The Danish National patient registry: A review of content, data quality, and research potential. *Clinical Epidemiology* vol. 7 449–490 (2015).
3. Pottegård, A. *et al.* Data resource profile: The Danish national prescription registry. *Int. J. Epidemiol.* **46**, 798 (2017).
4. von Elm, E. *et al.* The Strengthening the Reporting of Observational Studies in Epidemiology (STROBE) statement: guidelines for reporting observational studies. *Lancet* **370**, 1453–1457 (2007).
